# Supplementary material for: First clinical experience with the Kora pacemaker system in congenital complete heart block in newborn infants
Source: Springer Nature journal article supplement (doi:10.1186/s12887-019-1494-7), 2019-04-24
Supplement: MOESM4 [file 16674190]

Testanweisung beachten. Im Zweifelsfall bitte erneut informieren.

PATIENT 1

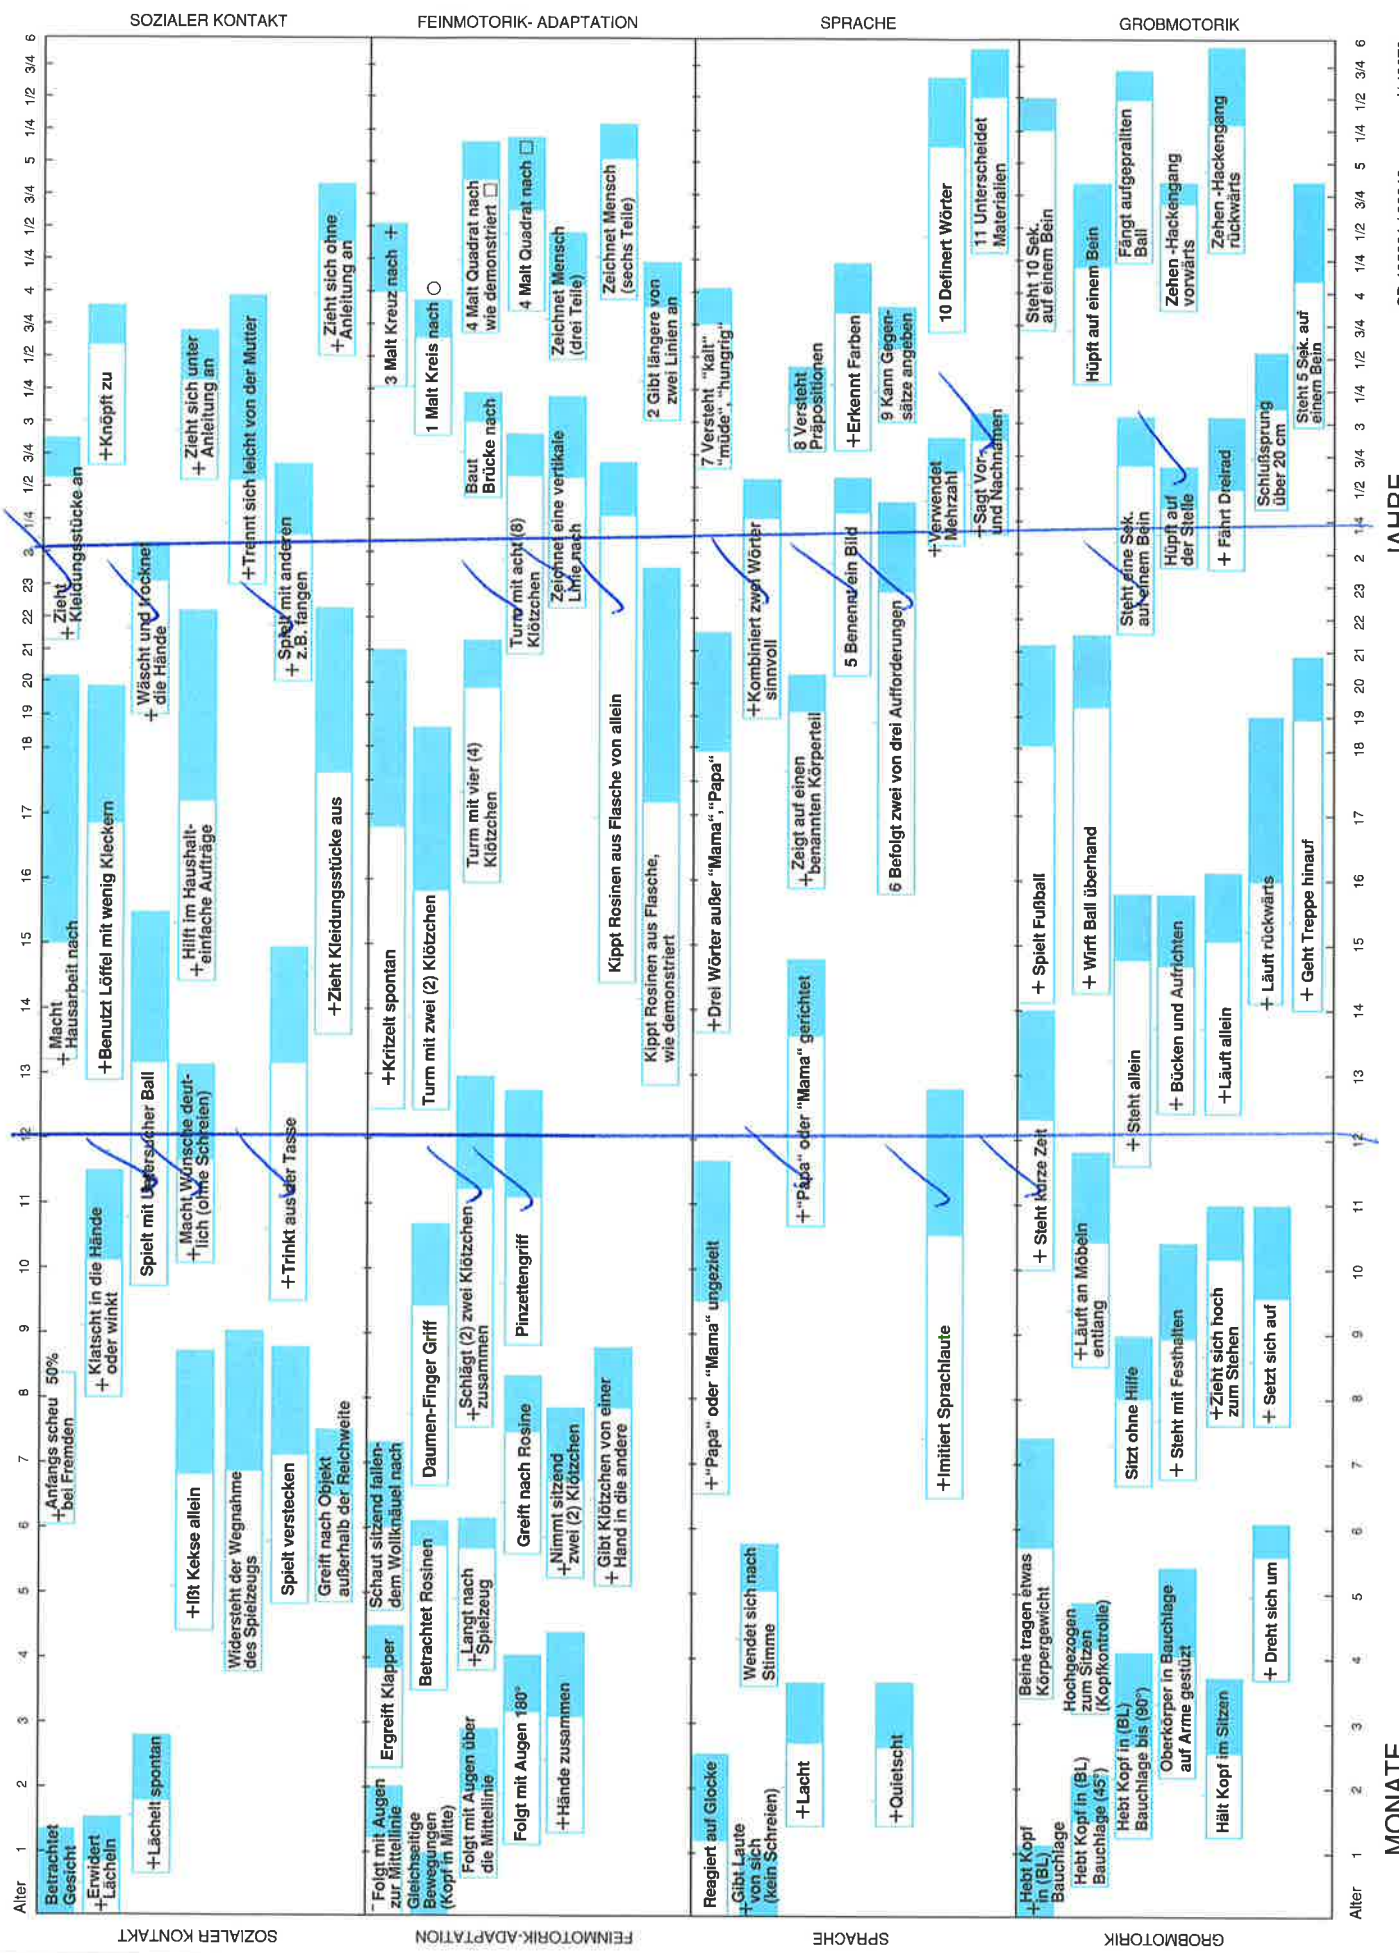

Name: \_\_\_\_\_

Geburtsdatum: \_\_\_\_\_

Datum der Untersuchung: \_\_\_\_\_

Report Form 2 (Siehe Rückseite)

90% 75% 50% 25%
