# Supplementary material for: First clinical experience with the Kora pacemaker system in congenital complete heart block in newborn infants
Source: Springer Nature journal article supplement (doi:10.1186/s12887-019-1494-7), 2019-04-24
Supplement: MOESM5 [file 16674190]

Testanweisung beachten. Im Zweifelsfall bitte erneut informieren.

PATIENT 2

MONATE

JAHRE

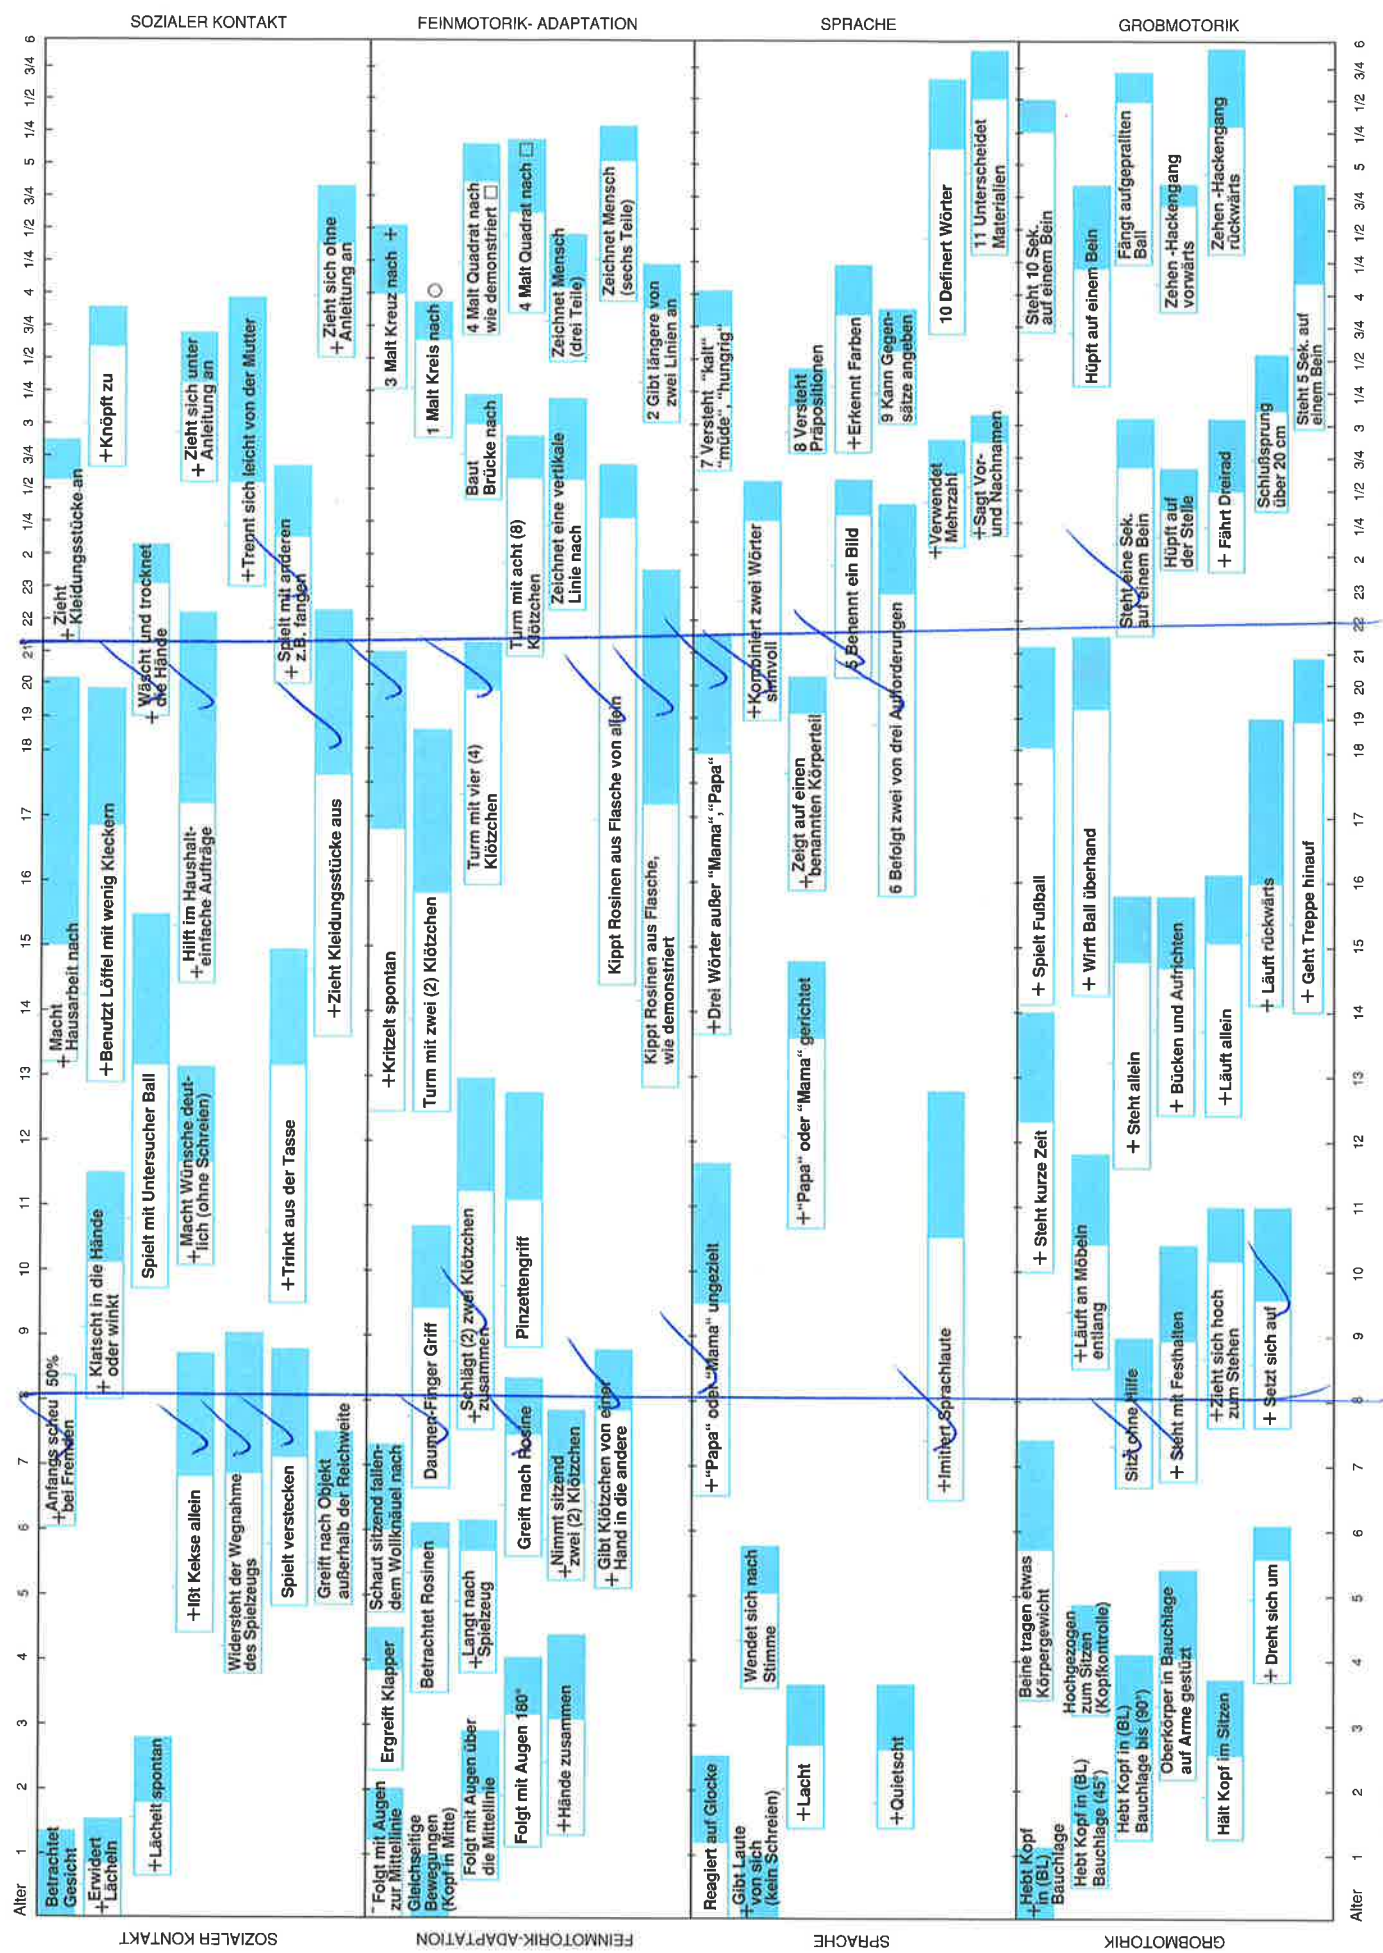

MONATE Alter 1 2 3 4 5 6 7 8 9 10 11 12 13 14 15 16 17 18 19 20 21 22 23 24 25 26 27 28 29 30 31 32 33 34 35 36 37 38 39 40 41 42 43 44 45 46 47 48 49 50 51 52 53 54 55 56 57 58 59 60

JAHRE 1 1/4 1/2 3/4 1 2 3 4 5 6

MONATE Alter 1 2 3 4 5 6 7 8 9 10 11 12 13 14 15 16 17 18 19 20 21 22 23 24 25 26 27 28 29 30 31 32 33 34 35 36 37 38 39 40 41 42 43 44 45 46 47 48 49 50 51 52 53 54 55 56 57 58 59 60

JAHRE 1 1/4 1/2 3/4 1 2 3 4 5 6

90% 75% 50% 25%

Fürnote

(Siehe Rückseite)

MONATE

JAHRE

SP-195331 / 90046

I143673
