# Supplementary material for: First clinical experience with the Kora pacemaker system in congenital complete heart block in newborn infants
Source: Springer Nature journal article supplement (doi:10.1186/s12887-019-1494-7), 2019-04-24
Supplement: MOESM6 [file 16674190]

Testanweisung beachten. Im Zweifelsfall bitte erneut informieren.

PATIENT 3

MONATE

JAHRE

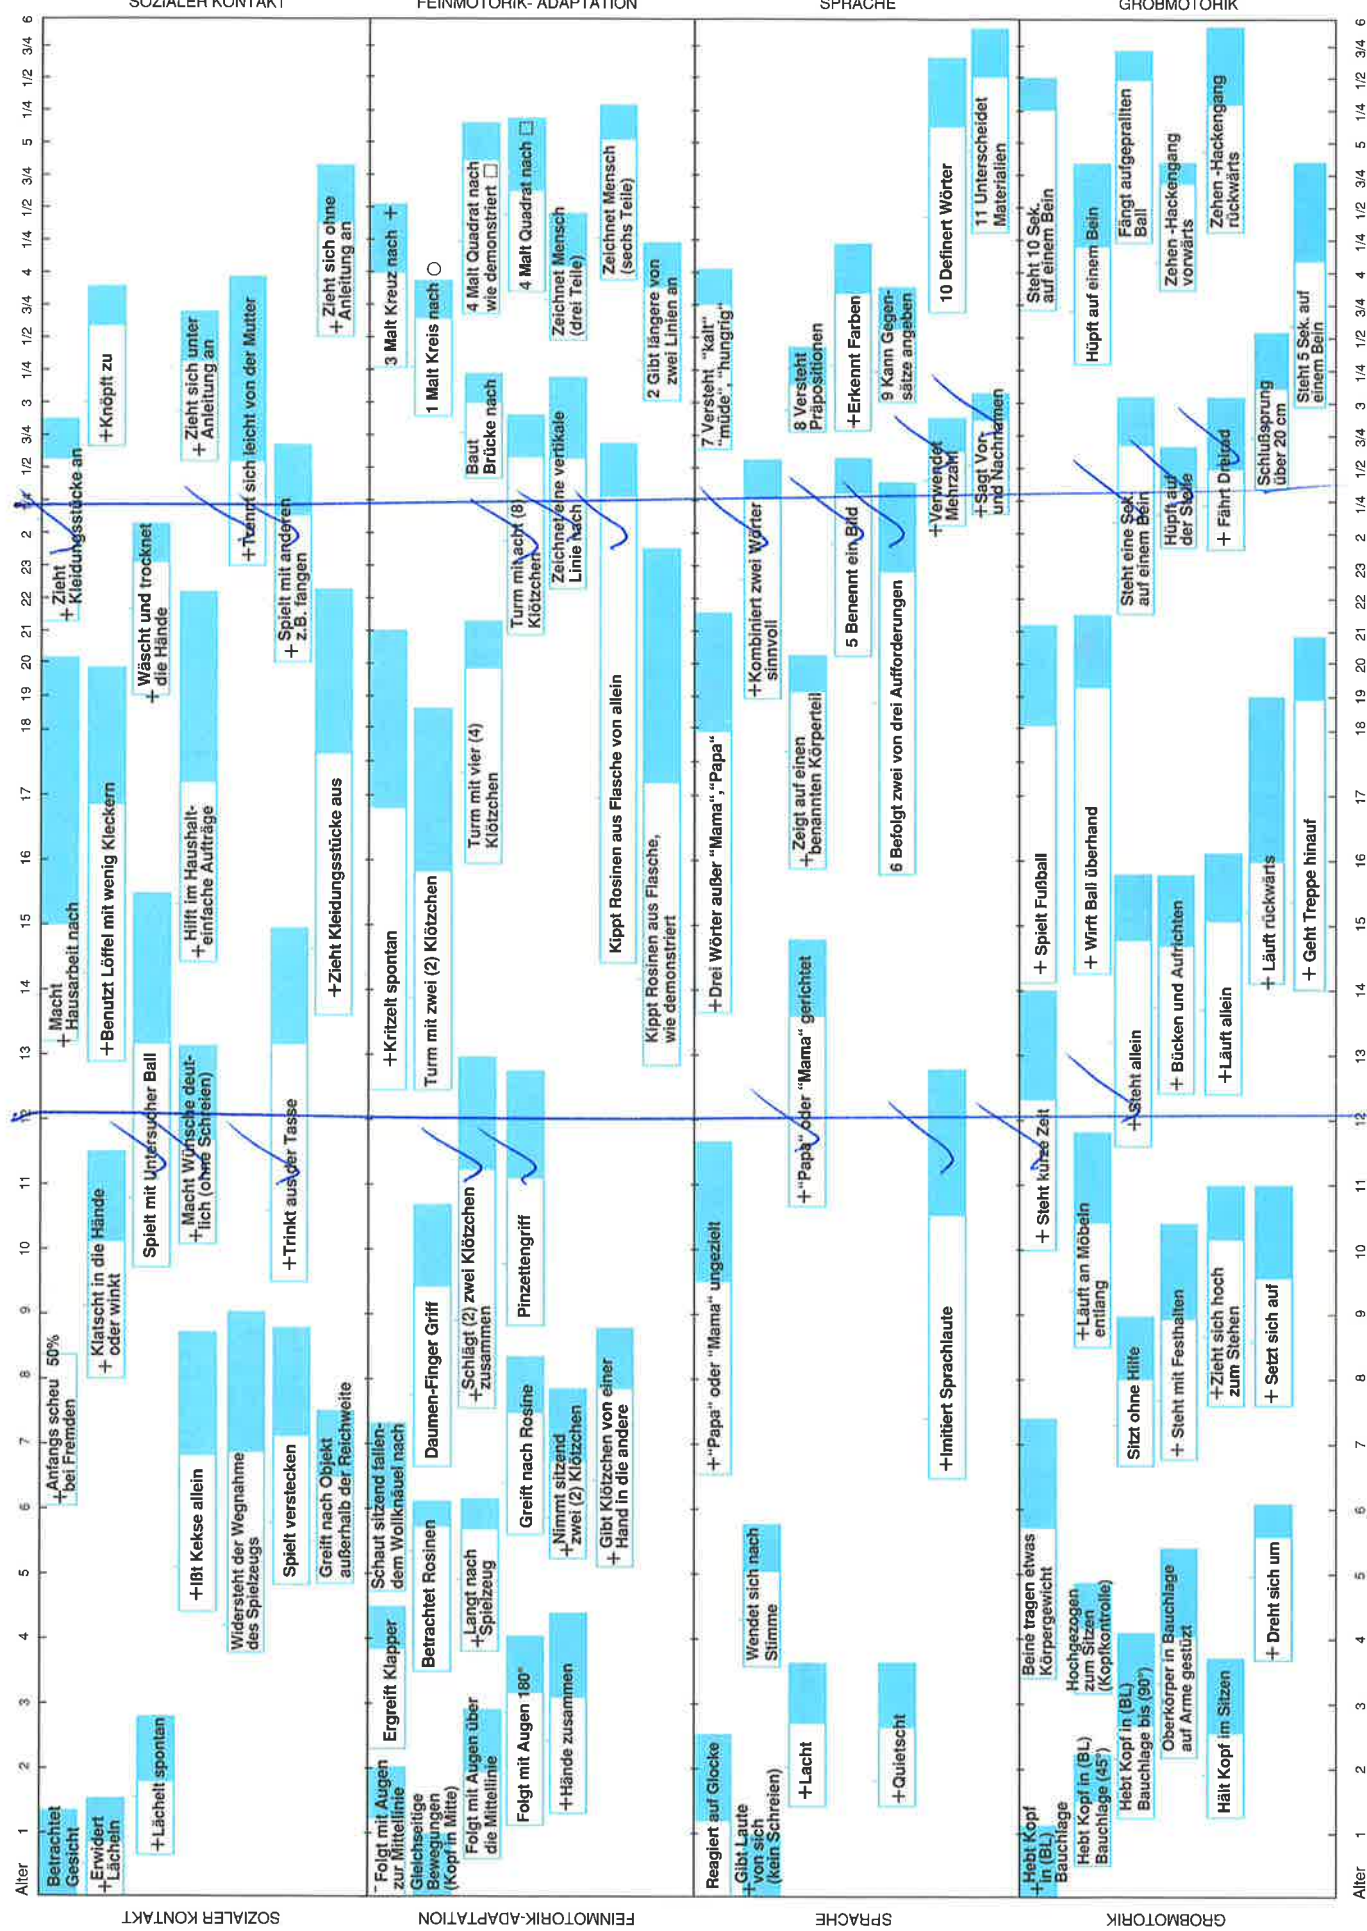

MONATE

JAHRE

Alter 1 2 3 4 5 6 1/2 3/4 4 5 6

Alter 1 2 3 4 5 6 1/2 3/4 4 5 6
